# Supplementary material for: Carbon Dioxide Tornado-Type Atmospheric-Pressure-Plasma-Jet-Processed rGO-SnO2 Nanocomposites for Symmetric Supercapacitors
Source: MDPI journal article supplement (doi:10.3390/ma14112777), 2021-05-24
Supplement: s1 [file s1]

Supplementary Materials

# Carbon Dioxide Tornado-Type Atmospheric-Pressure-Plasma-Jet-Processed rGO-SnO<sub>2</sub> Nanocomposites for Symmetric Supercapacitors

Jung-Hsien Chang <sup>1,2,†</sup>, Song-Yu Chen <sup>3,†</sup>, Yu-Lin Kuo <sup>3,\*</sup>, Chii-Rong Yang <sup>4</sup> and Jian-Zhang Chen <sup>1,2,5,\*</sup>

<sup>1</sup> Graduate Institute of Applied Mechanics, National Taiwan University, Taipei City 10617, Taiwan; r08543006@ntu.edu.tw

<sup>2</sup> Advanced Research Center for Green Materials Science and Technology, National Taiwan University, Taipei City 10617, Taiwan

<sup>3</sup> Department of Mechanical Engineering, National Taiwan University of Science and Technology, Taipei City 10607, Taiwan; D10803004@gapps.ntust.edu.tw

<sup>4</sup> Department of Mechatronic Engineering, National Taiwan Normal University, Taipei City 10610, Taiwan; ycr@ntnu.edu.tw

<sup>5</sup> Innovative Photonics Advanced Research Center (i-PARC), National Taiwan University, Taipei City 10617, Taiwan

\* Correspondence: ylkuo@mail.ntust.edu.tw (Y.-L.K.); jchen@ntu.edu.tw (J.-Z.C.)

† J.-H.C. and S.-Y.C. contributed equally to this work.

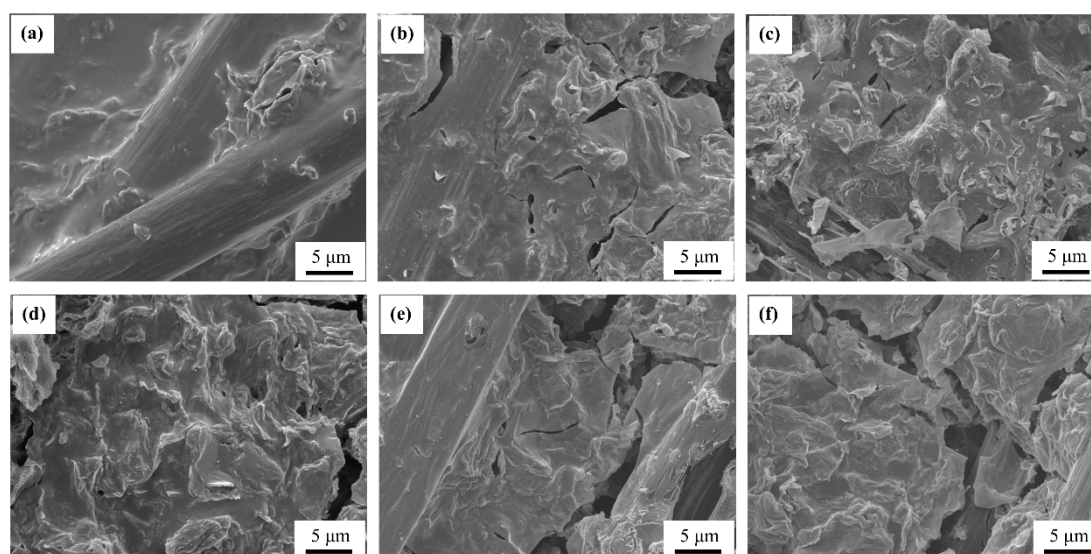

**Figure S1.** SEM images (3,000×) of rGO–SnO<sub>2</sub> electrodes scanned (a) zero, (b) one, (c) three, (d) five, (e) seven, and (f) nine times using CO<sub>2</sub> APPJ.

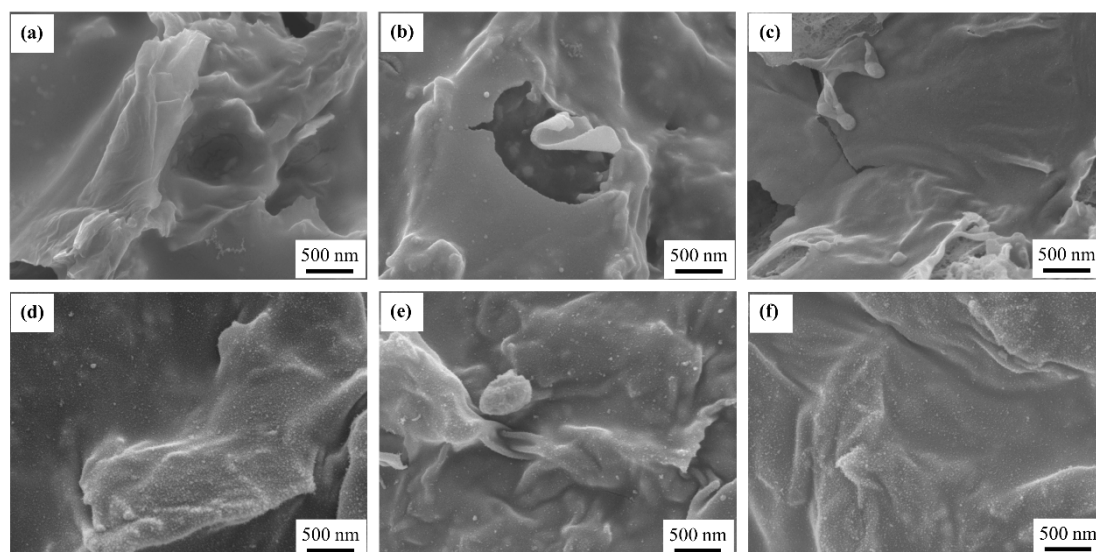

**Figure S2.** SEM images (30,000 $\times$ ) of rGO-SnO<sub>2</sub> electrodes scanned (a) zero, (b) one, (c) three, (d) five, (e) seven, and (f) nine times using CO<sub>2</sub> APPJ.

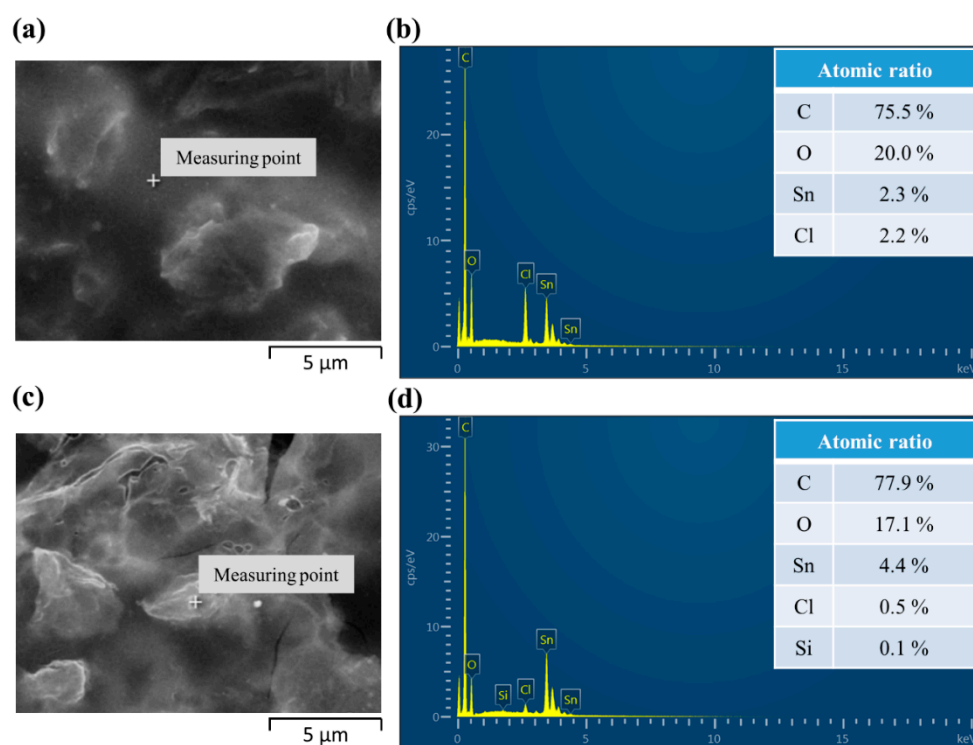

**Figure S3.** Energy-dispersive spectroscopy (EDS) analysis of the electrodes: (a) The measuring points of as-deposited electrode. (b) EDS analysis of as-deposited electrode. (c) The measuring points of seven-times APPJ-scanned electrode. (d) EDS analysis of seven-times APPJ scanned electrode.

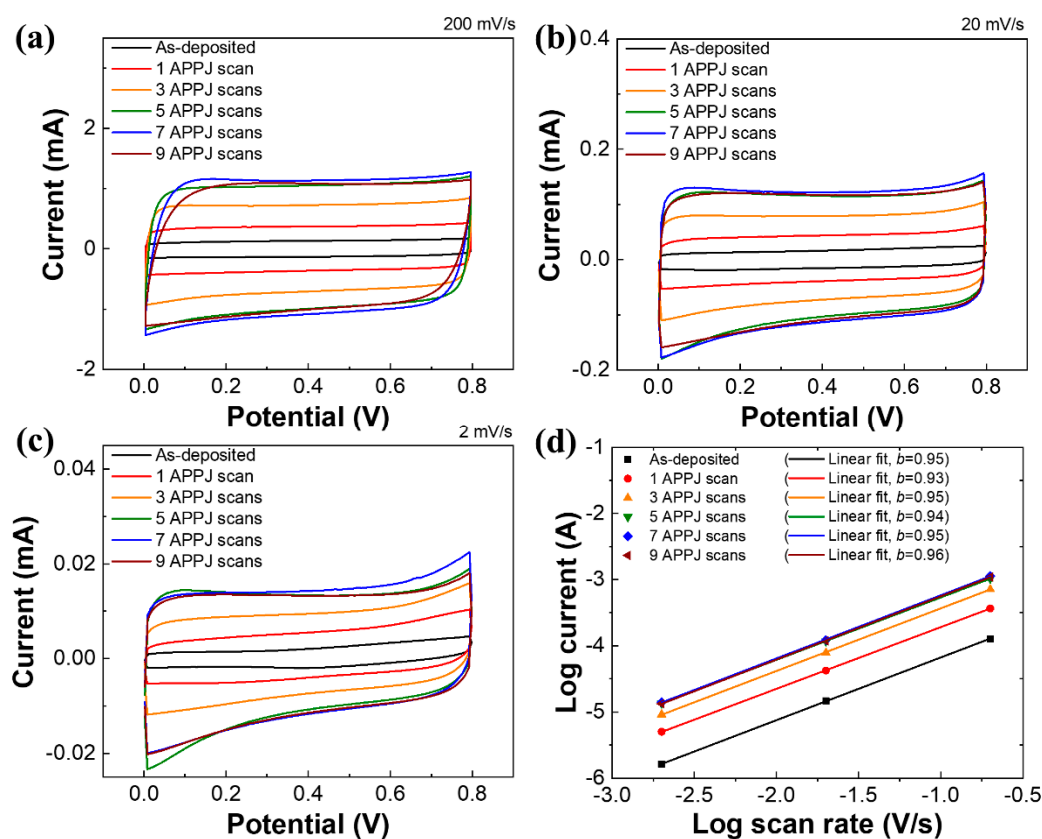

**Figure S4.** CV of bare carbon cloth SCs (without rGO–SnO<sub>2</sub>) under potential scan rates of (a) 200 mV, (b) 20 mV, and (c) 2 mV. (d) Logarithm of currents and scan rates.

**Table S1.** Areal capacitance of bare carbon cloth SCs (without rGO–SnO<sub>2</sub>).

| Number of APPJ scans | Areal capacitance (mF/cm <sup>2</sup> ) |      |      |
|----------------------|-----------------------------------------|------|------|
|                      | Potential scan rate (mV/s)              |      |      |
|                      | 2                                       | 20   | 200  |
| 0                    | 0.61                                    | 0.52 | 0.43 |
| 1                    | 1.57                                    | 1.37 | 1.20 |
| 3                    | 2.87                                    | 2.57 | 2.35 |
| 5                    | 4.28                                    | 3.76 | 3.31 |
| 7                    | 4.48                                    | 4.02 | 3.48 |
| 9                    | 4.24                                    | 3.80 | 3.18 |

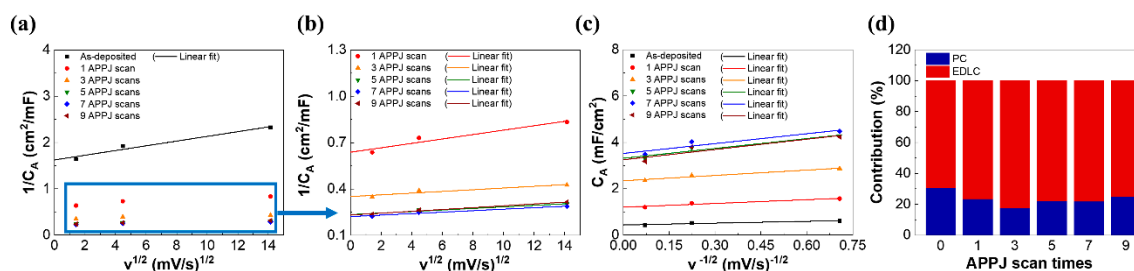

**Figure S5.** Trasatti plots of bare carbon cloth electrode SCs: (a,b)  $1/C_A$  vs.  $v^{1/2}$ , (c)  $C_A$  vs.  $v^{-1/2}$ , and (d) capacitive contribution.

**Table S2.** Capacitive contribution of carbon cloth SCs.

| Number of APPJ scans | $C_{\text{total}}$ (mF/cm <sup>2</sup> ) | $C_{\text{in}}$ (mF/cm <sup>2</sup> ) | $C_{\text{out}}$ (mF/cm <sup>2</sup> ) | Capacitive contribution (PC:EDLC) (%) |
|----------------------|------------------------------------------|---------------------------------------|----------------------------------------|---------------------------------------|
| 0                    | 0.62                                     | 0.19                                  | 0.43                                   | 30.6:69.4                             |
| 1                    | 1.57                                     | 0.37                                  | 1.20                                   | 23.6:76.4                             |
| 3                    | 2.85                                     | 0.51                                  | 2.34                                   | 17.9:82.1                             |
| 5                    | 4.27                                     | 0.96                                  | 3.31                                   | 22.5:77.5                             |
| 7                    | 4.52                                     | 1.00                                  | 3.52                                   | 22.1:77.9                             |
| 9                    | 4.32                                     | 1.08                                  | 3.24                                   | 25.0:75.0                             |

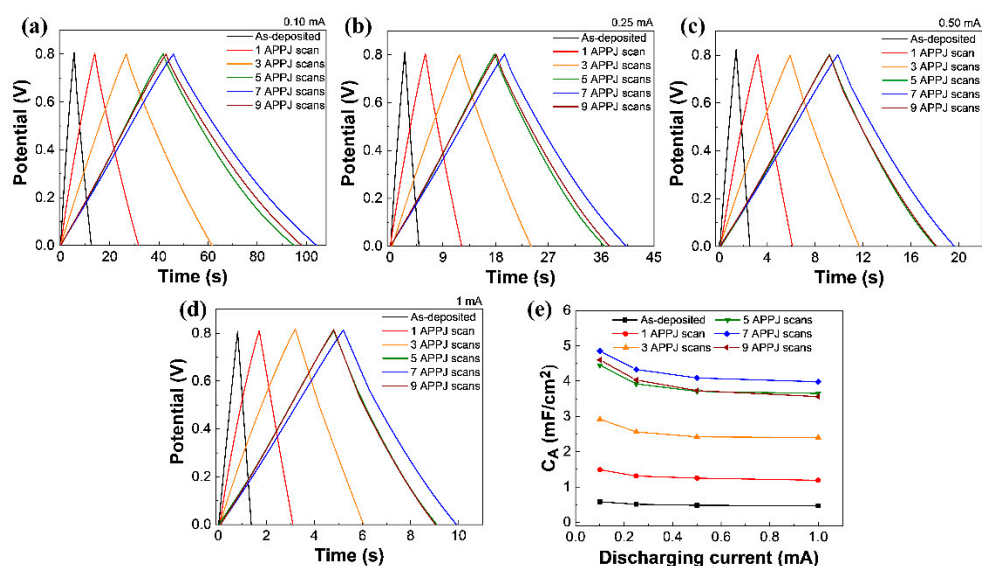

**Figure S6.** GCD of carbon cloth SC under constant current of (a) 0.10 mA, (b) 0.25 mA, (c) 0.50 mA, and (d) 1 mA. (e) Areal capacitances calculated based on GCD results.

**Table S3.** Areal capacitance of carbon cloth SCs calculated by GCD.

| Number of APPJ scans | Areal capacitance (mF/cm <sup>2</sup> ) |      |      |      |
|----------------------|-----------------------------------------|------|------|------|
|                      | Discharging current (mA)                |      |      |      |
|                      | 0.10                                    | 0.25 | 0.50 | 1    |
| 0                    | 0.58                                    | 0.51 | 0.48 | 0.47 |
| 1                    | 1.49                                    | 1.31 | 1.25 | 1.19 |
| 3                    | 2.92                                    | 2.56 | 2.42 | 2.40 |
| 5                    | 4.45                                    | 3.92 | 3.71 | 3.65 |
| 7                    | 4.85                                    | 4.33 | 4.09 | 3.98 |
| 9                    | 4.60                                    | 4.03 | 3.73 | 3.56 |
